# Supplementary material for: Pressure-sensitive Ce3+ photoluminescence in LiCaY5(BO3)6: high internal quantum yields and energy transfer to Tb3+
Source: Royal Society of Chemistry journal article supplement (doi:10.1039/d2tc03611h), 2022-01-01
Supplement: d2tc03611h1.pdf [file d2tc03611h1.pdf]

Supporting Information for

Pressure sensitive Ce<sup>3+</sup> photoluminescence in LiCaY<sub>5</sub>(BO<sub>3</sub>)<sub>6</sub>: High  
internal quantum yields and energy transfer to Tb<sup>3+</sup>

*Yan Gao,<sup>a</sup> Yunwei Zhao,<sup>ab</sup> Pengfei Jiang,<sup>a</sup> Ting Wen,<sup>b\*</sup> Yonggang Wang,<sup>c</sup> Rihong Cong,<sup>a\*</sup>*

*Tao Yang<sup>a\*</sup>*

<sup>a</sup> College of Chemistry and Chemical Engineering, Chongqing University, Chongqing  
401331, People's Republic of China

<sup>b</sup> Center for High Pressure Science and Technology Advanced Research, Beijing 100193,  
People's Republic of China

<sup>c</sup> School of Materials Science and Engineering, Peking University, Beijing 100871,  
People's Republic of China

\*Corresponding authors: congrihong@cqu.edu.cn; ting.wen@hpstar.ac.cn;  
taoyang@cqu.edu.cn.

**Table S1.** Unit cell lattice parameters for  $\text{LiCa}(\text{Y}_{1-x}\text{Ce}_x)_5(\text{BO}_3)_6$  ( $0 \leq x \leq 0.15$ ) and  $\text{LiCa}(\text{Y}_{0.99-y}\text{Ce}_{0.01}\text{Tb}_y)_5(\text{BO}_3)_6$  ( $0.05 \leq y \leq 0.40$ ) obtained by Le Bail refinements in the space group  $P6_522$

| $x$  | $a$ (Å)   | $c$ (Å)    | $V$ (Å <sup>3</sup> ) |
|------|-----------|------------|-----------------------|
| 0    | 7.0101(1) | 25.4325(2) | 1082.36(1)            |
| 0.01 | 7.0129(1) | 25.4319(4) | 1083.18(4)            |
| 0.03 | 7.0164(1) | 25.4399(4) | 1084.61(3)            |
| 0.05 | 7.0216(2) | 25.4568(6) | 1086.93(6)            |
| 0.07 | 7.0280(1) | 25.4771(6) | 1089.80(5)            |
| 0.10 | 7.0356(2) | 25.5023(7) | 1093.23(6)            |
| 0.15 | 7.0469(3) | 25.5291(1) | 1097.61(9)            |

  

| $y$  | $a$ (Å)   | $c$ (Å)    | $V$ (Å <sup>3</sup> ) |
|------|-----------|------------|-----------------------|
| 0.05 | 7.0132(1) | 25.4354(3) | 1083.43(3)            |
| 0.10 | 7.0147(1) | 25.4418(5) | 1084.18(4)            |
| 0.20 | 7.0186(1) | 25.4746(4) | 1086.77(3)            |
| 0.30 | 7.0208(1) | 25.4972(5) | 1088.41(4)            |
| 0.40 | 7.0264(2) | 25.5296(7) | 1091.54(6)            |

**Table S2.** CIE color coordinates and internal quantum yields (IQYs) for  $\text{LiCa}(\text{Y}_{0.99-y}\text{Ce}_{0.01}\text{Tb}_y)_5(\text{BO}_3)_6$  ( $0 \leq y \leq 0.40$ ) under the excitation at 336 nm

| $y$  | CIE coordinate | IQY (%) |
|------|----------------|---------|
| 0    | (0.157, 0.045) | 51      |
| 0.05 | (0.231, 0.312) | 79      |
| 0.10 | (0.257, 0.408) | 77      |
| 0.20 | (0.289, 0.528) | 89      |
| 0.30 | (0.296, 0.550) | 60      |
| 0.40 | (0.297, 0.548) | 30      |

**Table S3.** Parameters obtained by fitting the decay curves using double exponential functions and the calculated life time ( $\tau$ ) and energy transfer efficiency ( $\eta_{ET}$ ) for  $\text{LiCa}(\text{Y}_{0.99-y}\text{Ce}_{0.01}\text{Tb}_y)_5(\text{BO}_3)_6$  ( $0 \leq y \leq 0.40$ ) phosphors

| $y$         | $A_1$ | $\tau_1$ (ns) | $A_2$ | $\tau_2$ (ns) | $\tau$ (ns) | $\eta_{ET}=1-\tau/\tau_0$ |
|-------------|-------|---------------|-------|---------------|-------------|---------------------------|
| <b>0</b>    | 570   | 6.98          | 415   | 28.11         | 22.74       |                           |
| <b>0.05</b> | 841   | 5.37          | 391   | 23.66         | 17.66       | 22.34%                    |
| <b>0.1</b>  | 1086  | 4.86          | 368   | 21.52         | 14.86       | 34.66%                    |
| <b>0.15</b> | 5415  | 2.43          | 400   | 14.51         | 6.13        | 73.05%                    |
| <b>0.2</b>  | 25326 | 1.63          | 363   | 12.3          | 2.67        | 88.25%                    |
| <b>0.3</b>  | 70046 | 1.37          | 264   | 12.28         | 1.73        | 92.41%                    |

**Table S4.** CIE color coordinate of  $\text{LiCa}(\text{Y}_{0.99}\text{Ce}_{0.01})_5(\text{BO}_3)_6$  under different pressures ( $\lambda_{\text{ex}} = 375 \text{ nm}$ )

| <b>Pressure (GPa)</b> | <b>CIE coordinate</b> |
|-----------------------|-----------------------|
| 0.5                   | (0.195, 0.124)        |
| 1.2                   | (0.194, 0.125)        |
| 2.1                   | (0.180, 0.113)        |
| 2.6                   | (0.177, 0.112)        |
| 3.5                   | (0.179, 0.120)        |
| 4                     | (0.175, 0.118)        |
| 4.5                   | (0.170, 0.111)        |
| 5.2                   | (0.172, 0.122)        |
| 7                     | (0.168, 0.124)        |
| 8.7                   | (0.176, 0.157)        |
| 10.2                  | (0.1762, 0.158)       |
| 11.6                  | (0.171, 0.150)        |
| 13.2                  | (0.177, 0.171)        |
| 14.9                  | (0.182, 0.190)        |
| 16.1                  | (0.191, 0.215)        |
| 17.6                  | (0.229, 0.264)        |
| 19.8                  | (0.234, 0.282)        |
| 20.1                  | (0.255, 0.305)        |
| release               | (0.190, 0.117)        |

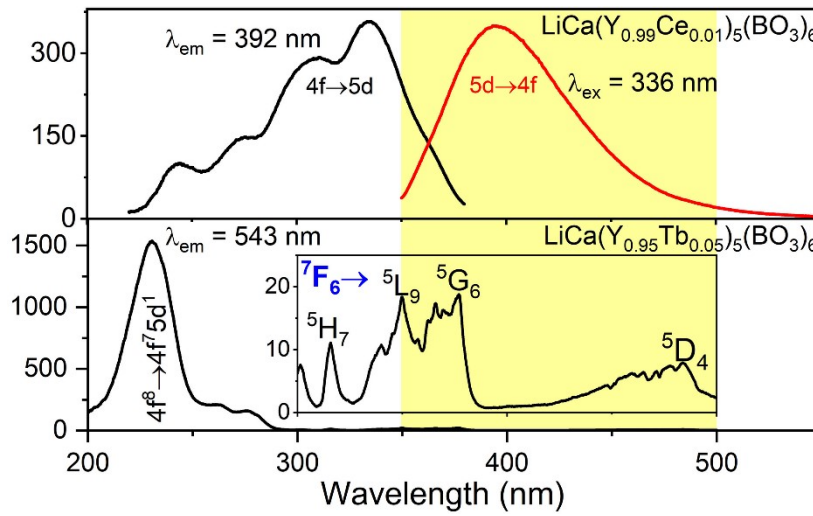

**Fig. S1.** Spectral comparison between two singly doped phosphors. The yellow area highlights the overlap between the PL spectrum for  $\text{LiCa}(\text{Y}_{0.99}\text{Ce}_{0.01})_5(\text{BO}_3)_6$  and the PLE spectrum for  $\text{LiCa}(\text{Y}_{0.95}\text{Tb}_{0.05})_5(\text{BO}_3)_6$ .

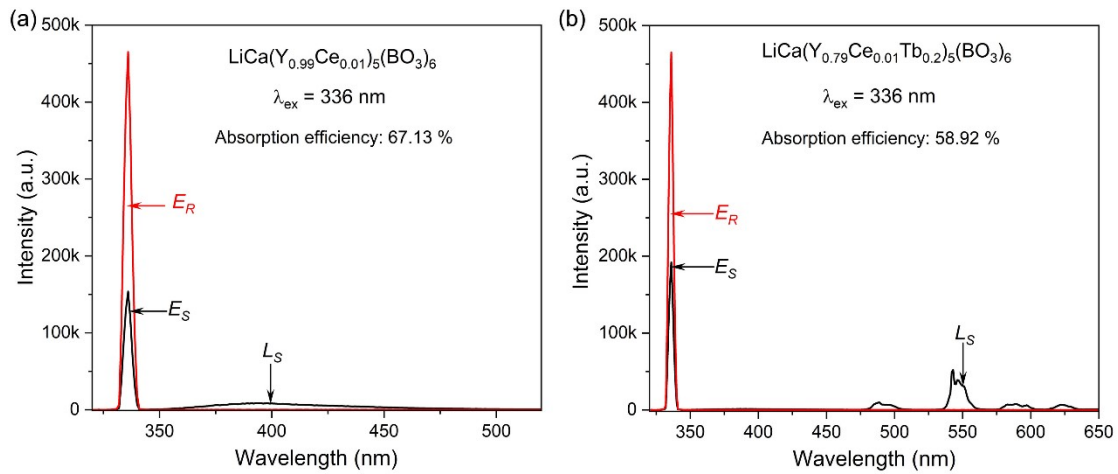

**Fig. S2.** Absorption efficiency monitored at 336 nm excitation for  $\text{LiCa}(\text{Y}_{0.99}\text{Ce}_{0.01})_5(\text{BO}_3)_6$  and  $\text{LiCa}(\text{Y}_{0.79}\text{Ce}_{0.01}\text{Tb}_{0.2})_5(\text{BO}_3)_6$ .

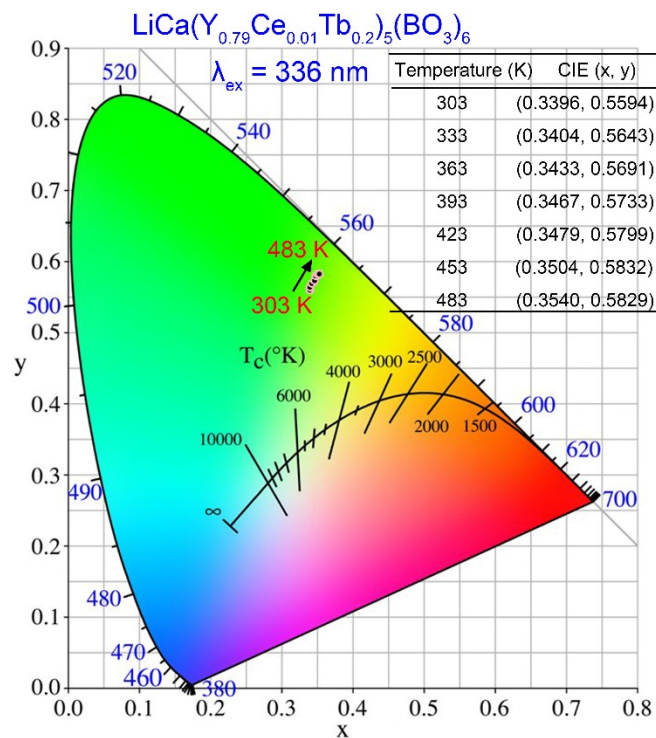

**Fig. S3.** Calculated CIE chromaticity coordinate for  $\text{LiCa}(\text{Y}_{0.79}\text{Ce}_{0.01}\text{Tb}_{0.2})_5(\text{BO}_3)_6$  at high temperatures ( $\lambda_{\text{ex}} = 336\text{nm}$ ).

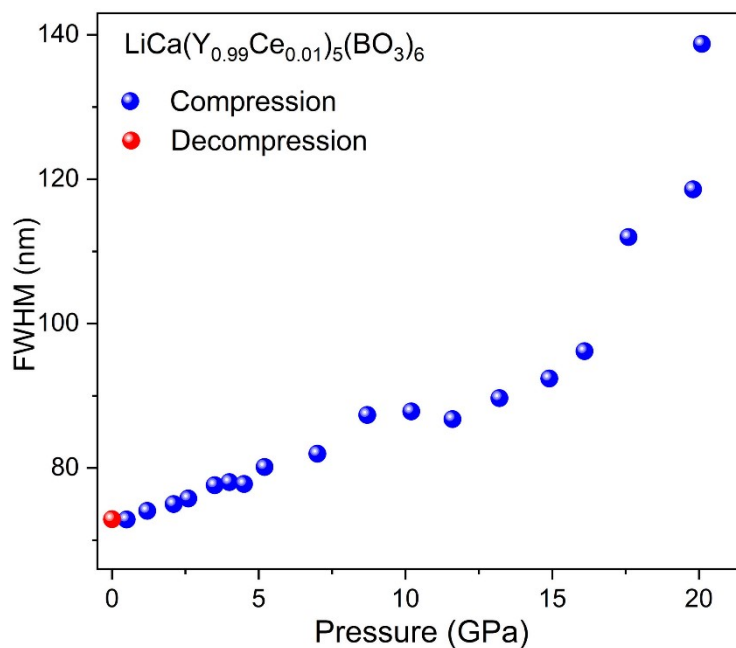

**Fig. S4.** Full width at half maximum (FWHM) of  $\text{Ce}^{3+}$  emission band for  $\text{LiCa}(\text{Y}_{0.99}\text{Ce}_{0.01})_5(\text{BO}_3)_6$  at different pressures ( $\lambda_{\text{ex}} = 375\text{nm}$ ).
